# Supplementary material for: Financial Burden of Out-of-pocket Health Expenditures in Türkiye: Under Covid-19
Source: Research Square preprint supplement (doi:10.21203/rs.3.rs-7924397/v1), 2025-11-10
Supplement: Supplementary file 1 [file 4ce34676de8acdbddd21d9ac.docx]

**Appendix**

Appendix Table 1: Average Expenditures

|  | Year | n | Mean *OOP* | Mean *OOP* | Mean Family Expenditure | Mean Family Expenditure | *OOP* / Total Expenditure |
| --- | --- | --- | --- | --- | --- | --- | --- |
| (TL) | (PPP $) | (TL) | (PPP $) | (%) |
| All Sample | 2019 | 38,744 | 98.79 | 51.99 | 4,918.84 | 2,588.87 | 1.85 |
| 2022 | 39,188 | 245.37 | 49.07 | 12,201.13 | 2,440.23 | 1.79 |
| *OOP*/exp ≤ 10% | 2019 | 37,087 | 58.15 | 30.61 | 4,907.89 | 2,583.10 | 1.11 |
| 2022 | 37,475 | 120.95 | 24.19 | 12,138.93 | 2,427.79 | 0.89 |
| *OOP*/exp > 10% | 2019 | 1,657 | 1,008.28 | 530.67 | 5,163.92 | 2,717.85 | 18.38 |
| 2022 | 1,713 | 2967.24 | 593.45 | 13,561.80 | 2,712.36 | 21.33 |

Source: Our calculations from HBS 2019 & 2022.
